# Supplementary material
Source: ML conference proceedings conference paper supplement (https://openreview.net/forum?id=18TezdB9nk)
Supplement: supplementary_material [file attachment]

Blank file
